# Supplementary material
Source: PubMed Central journal article supplement (PMC4633819)
Supplement: ncomms9565-s1.pdf [file ncomms9565-s1.pdf]

## Supplementary Figure 1

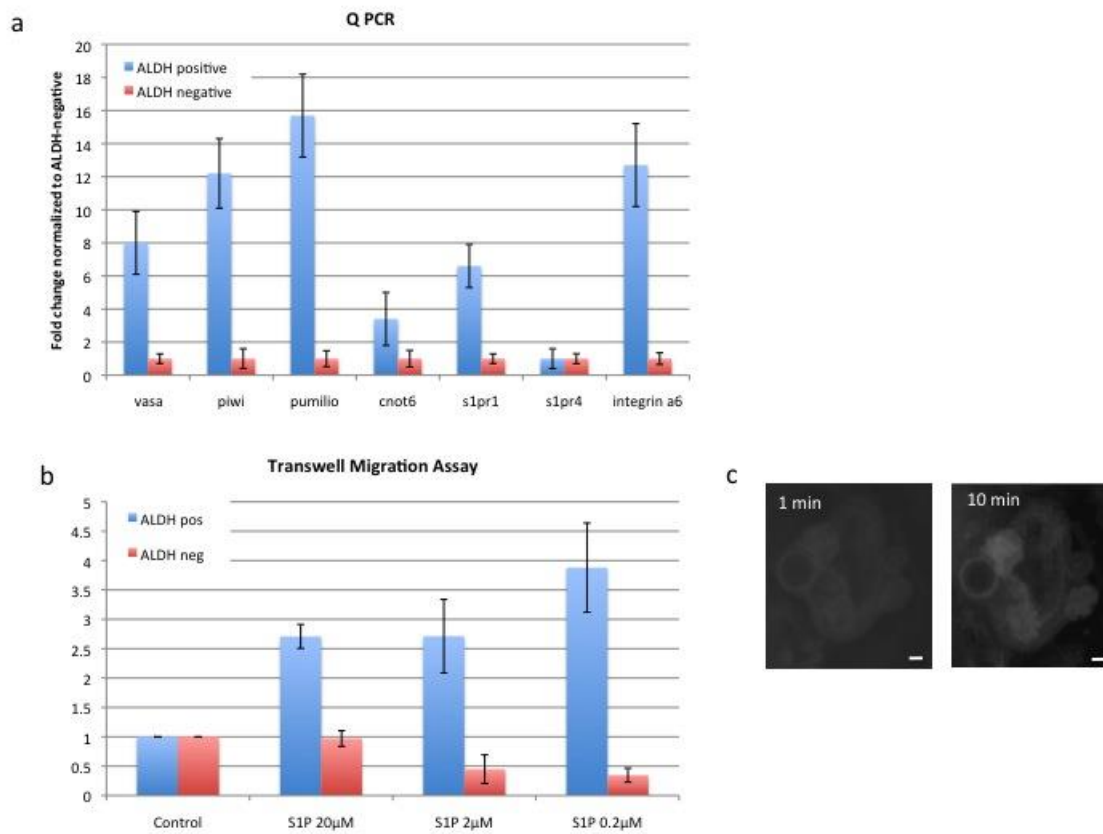

Supplementary Figure 1: **RT-PCR and migration assay of ADLH-positive cells, Sphingosine-Fluorescein live imaging.** **a)** Q-RT-PCR analysis of sorted ALDH-positive and ALDH-negative cells. Relative quantification was performed using the  $2^{-\Delta\Delta CT}$ -method, with *ef1a* as control gene. Data are expressed as averages of the expression ratio (fold change), normalized to ALDH-negative cells. Standard deviations were calculated for each average expression ratio. **b)** Transwell migration assay of sorted ALDH-positive and ALDH-negative cells in response to decreasing concentrations of S1P. No stimulant was added to control wells. Sorted cells were added to the upper chamber of a transwell system, and after 2 h, migrated cells in the lower chamber were counted. Data are expressed as fold changes of numbers of migrated cells, normalized to controls. Error bars represent the standard deviation for each average (n=4). **c)** Control for experiment shown in Figure 7 B. Live imaging of fluorescence intensity after injection of Sphingosine-Fluorescein into the blood stream. After 10 minutes, Sphingosine-Fluorescein accumulates in developing oocytes, testes and the stomach of the primary bud. Scale bars = 30µm.

Supplementary Table 1: qPCR primers

|                  |                         | Efficiency |
|------------------|-------------------------|------------|
| ef1a –Forward    | CGTGGTCATTGGCCACGTAGA   |            |
| ef1a-Reverse     | ATGAAATCACGATGACCGGGA   | 100%       |
| Vasa-forward     | GGCGGATTTAGCGATGATGAG   | 101%       |
| Vasa-reverse     | TTCCCCCATAGCGACTGTTAGAC |            |
| Piwi             | GACAACGAGCTACGCAACTGC   | 91%        |
| Piwi             | CTCACGTTGAACGCCAGACTT   |            |
| Pumilio          | GTCCATGTACGGTTCTGCCA    | 108%       |
| pumilio          | TTCGGGAAACGGTTGTTTCCT   |            |
| Cnot6            | CTACGACGACACTGAGCAGG    | 107%       |
| Cnot6            | TCGGTGGGGGCATCCTAATA    |            |
| S1pr1 Forward    | TTACTCCATCAGGATGCCGC    | 93%        |
| S1pr reverse     | TTCTGCGAGATTTCCGCCTT    |            |
| Integrin alpha 6 | ACTTCCGGCACGAACAAGAT    | 110%       |
| Integrin alpha 6 | GTACAACAGGGTAACCGGGG    |            |
| Integrin beta-1  | TTCGTGTTGATACGGTCGCA    | 105%       |
| Integrin-beta 1  | GCACCAATCCAACACGGAC     |            |

Efficiency: Primer pairs were analyzed for qPCR amplification efficiency using calibration dilution curves. Amplification efficiency is expressed as percentage.

Supplementary Table 2: Cloning primers

|                          |                        | Product length |
|--------------------------|------------------------|----------------|
| Vasa-forward             | AGGCACTATGATTCAGCCTGTG | 976            |
| Vasa-reverse             | ATCATAATCACCCGTCTCGCG  |                |
| S1pr1 Forward            | GTCGCGTGTTTGATAGCGTC   |                |
| S1pr1 reverse            | TTCTGCGAGATTTCCGCCTT   | 979            |
| Integrin-alpha-6-forward | TCGGGGTTTTGTAGGTCGTG   | 657            |
| Integrin-alpha-6-reverse | GCGATAACGATCGGACTGGT   |                |
